# Supplementary material
Source: PubMed Central journal article supplement (PMC6136064)

Fig. S1

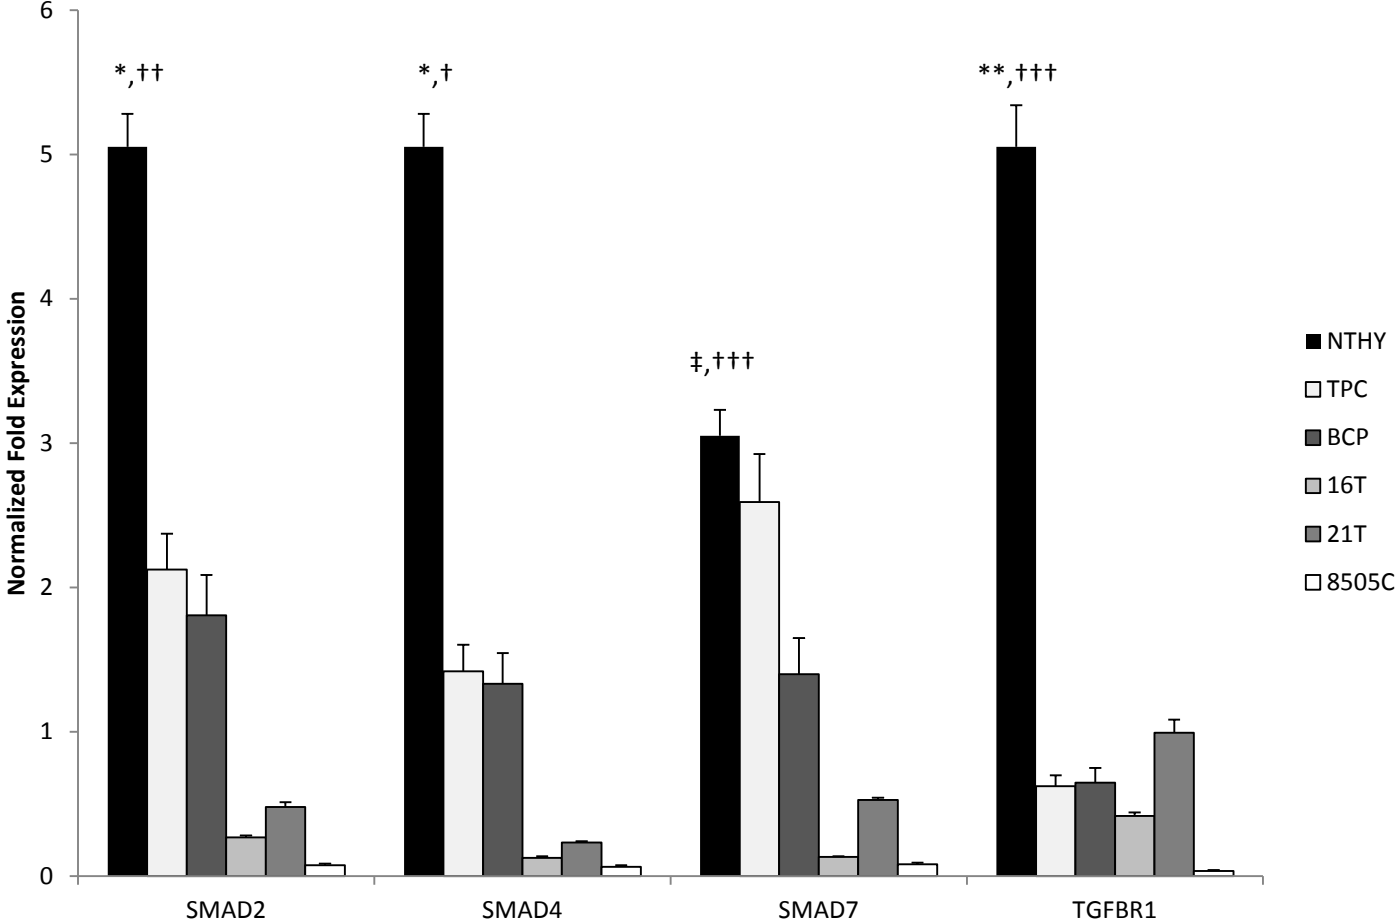

Supplement: mmc1.pdf [file mmc1.pdf]

Fig. S2

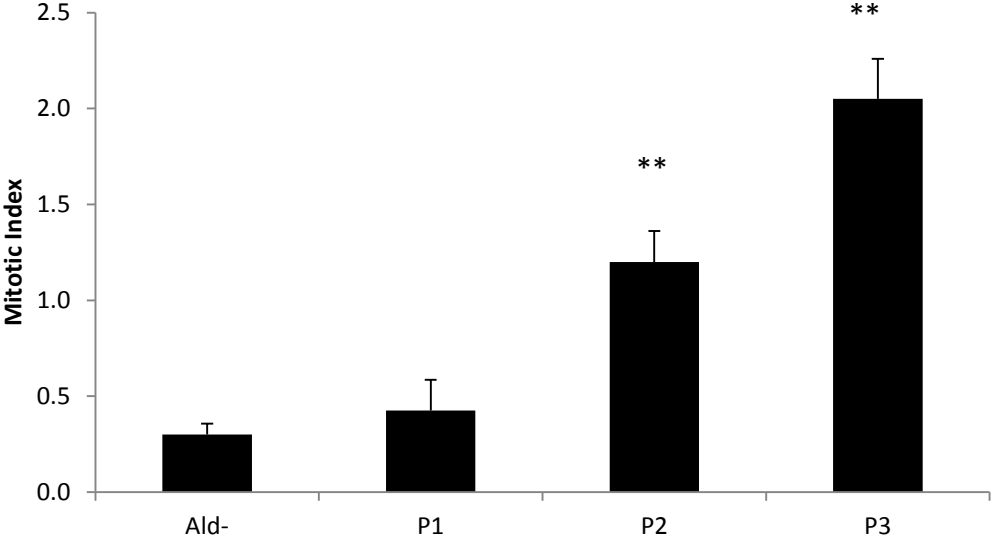

Supplement: mmc2.pdf [file mmc2.pdf]

Fig. S3

A

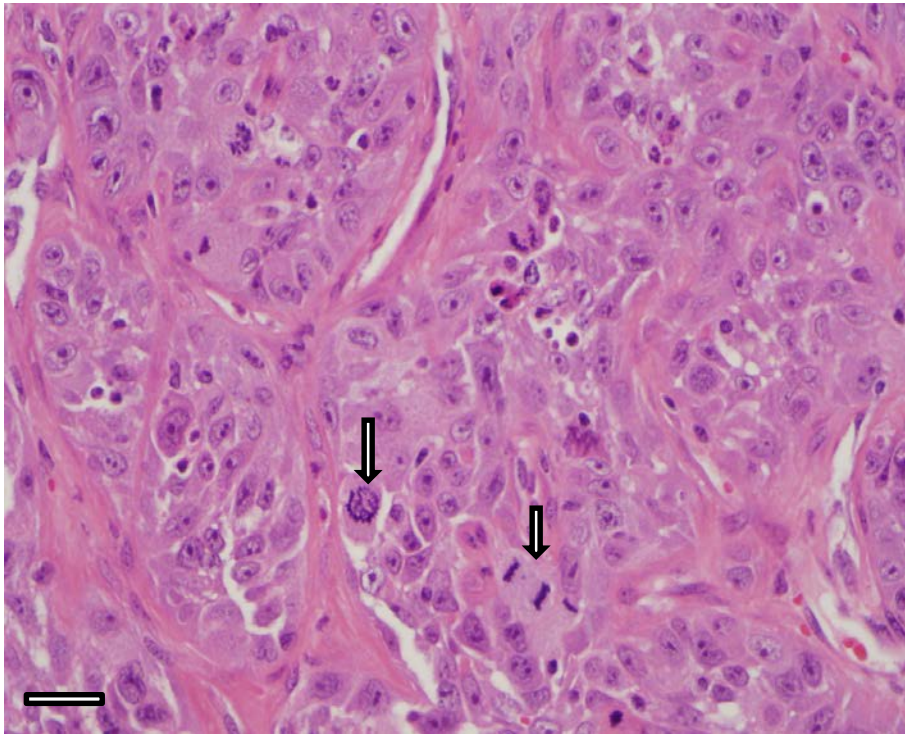

B

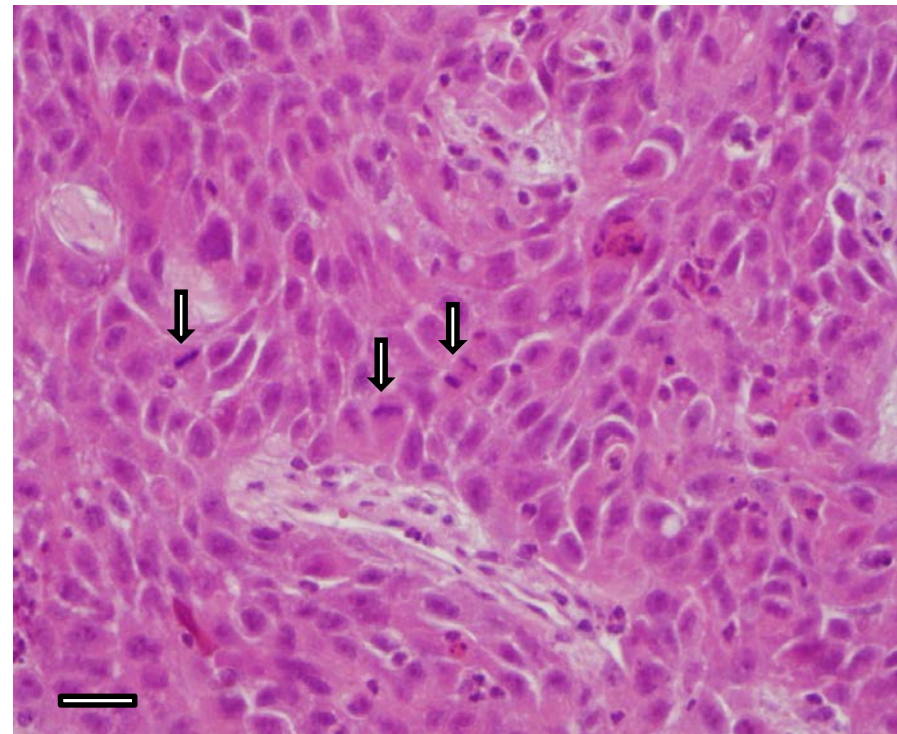

Supplement: mmc3.pdf [file mmc3.pdf]
